# Supplementary material for: Antimicrobial, Probiotic, and Immunomodulatory Potential of Cannabis sativa Extract and Delivery Systems
Source: MDPI journal article supplement (doi:10.3390/antibiotics13040369), 2024-04-17
Supplement: s1 [file s1]

# Supplementary materials

## Antimicrobial, Probiotic, and Immunomodulatory Potential of *Cannabis sativa* Extract and Delivery Systems

Anna Stasiłowicz-Krzemień <sup>1,\*</sup>, Daria Szymanowska <sup>1,2</sup>, Piotr Szulc <sup>2</sup> and Judyta Cielecka-Piontek <sup>1,3,\*</sup>

<sup>1</sup> Department of Pharmacognosy and Biomaterials, Faculty of Pharmacy, Poznan University of Medical Sciences, Rokietnicka 3, 60-806 Poznan, Poland; astasilowicz@ump.edu.pl, jpiontek@ump.edu.pl

<sup>2</sup> Department of Biotechnology and Food Microbiology, Poznan University of Life Sciences, 48 Wojska Polskiego Street, 60-627 Poznan, Poland, daria.szymanowska@up.poznan.pl

<sup>3</sup> Department of Agronomy, Poznań University of Life Sciences, Dojazd 11, 60-632 Poznań, Poland; piotr.szulc@up.poznan.pl

<sup>4</sup> Department of Pharmacology and Phytochemistry, Institute of Natural Fibres and Medicinal Plants, Wojska Polskiego 71b, 60-630 Poznan, Poland

\* Correspondence: astasilowicz@ump.edu.pl; jpiontek@ump.edu.pl

**Table S1.** The microorganisms and growth conditions used in studies investigating antimicrobial and probiotic potential.

| Microorganism                       | Strain     | Type of Culture Collection                        | Culture Media | Growth Conditions                 |
|-------------------------------------|------------|---------------------------------------------------|---------------|-----------------------------------|
| <i>Clostridium difficile</i>        | ATCC 9689  | American Type Culture Collection                  | Muller-Hinton | Anaerobic, 37°C, 48 h             |
| <i>Listeria monocytogenes</i>       | ATCC 7644  | American Type Culture Collection                  | Muller-Hinton | Facultative anaerobic, 37°C, 48 h |
| <i>Enterococcus faecalis</i>        | ATCC 29212 | American Type Culture Collection                  | Muller-Hinton | Facultative anaerobic, 37°C, 48 h |
| <i>Staphylococcus aureus</i>        | ATCC 25923 | American Type Culture Collection                  | Muller-Hinton | Aerobic, 37°C, 48 h               |
| <i>Staphylococcus pyogenes</i>      | ATCC 19615 | American Type Culture Collection                  | Muller-Hinton | Aerobic, 37°C, 48 h               |
| <i>Escherichia coli</i>             | ATCC 25922 | American Type Culture Collection                  | Muller-Hinton | Facultative anaerobic, 37°C, 48 h |
| <i>Klebsiella pneumoniae</i>        | ATCC 31488 | American Type Culture Collection                  | Muller-Hinton | Facultative anaerobic, 37°C, 48 h |
| <i>Salmonella typhimurium</i>       | ATCC 14028 | American Type Culture Collection                  | Muller-Hinton | Facultative anaerobic, 37°C, 48 h |
| <i>Pseudomonas aeruginosa</i>       | ATCC 27853 | American Type Culture Collection                  | Muller-Hinton | Facultative anaerobic, 37°C, 48 h |
| <i>Candida albicans</i>             | ATCC 10231 | American Type Culture Collection                  | Muller-Hinton | Aerobic, 37°C, 72 h               |
| <i>Lactobacillus acidophilus</i>    | 4356       | American Type Culture Collection                  | Muller-Hinton | Facultative anaerobic, 37°C, 48 h |
| <i>Lactobacillus casei</i>          | ATCC 393   | American Type Culture Collection                  | Muller-Hinton | Facultative anaerobic, 37°C, 48 h |
| <i>Lactobacillus plantarum</i>      | ATCC 14917 | American Type Culture Collection                  | Muller-Hinton | Facultative anaerobic, 37°C, 48 h |
| <i>Lactobacillus brevis</i>         | ATCC 8287  | American Type Culture Collection                  | Muller-Hinton | Facultative anaerobic, 37°C, 48 h |
| <i>Lactobacillus rhamnosus</i> GG   | ATCC 53103 | American Type Culture Collection                  | Muller-Hinton | Facultative anaerobic, 37°C, 48 h |
| <i>Lactobacillus reuteri</i>        | ATCC 5289  | American Type Culture Collection                  | Muller-Hinton | Facultative anaerobic, 37°C, 48 h |
| <i>Pediococcus pentosaceus</i>      | ATCC 25745 | American Type Culture Collection                  | Muller-Hinton | Aerobic, 37°C, 48 h               |
| <i>Lactococcus lactis</i>           | ATCC 11955 | American Type Culture Collection                  | Muller-Hinton | Facultative anaerobic, 37°C, 48 h |
| <i>Lactobacillus fermentum</i> LF 2 | LMG 27299  | Belgian Coordinated Collections of Microorganisms | Muller-Hinton | Facultative anaerobic, 37°C, 48 h |

|                                        |            |                                                             |               |                     |
|----------------------------------------|------------|-------------------------------------------------------------|---------------|---------------------|
| <i>Streptococcus thermophilus</i> FP 4 | DSMZ 18616 | German Collection<br>of Microorganisms<br>and Cell Cultures | Muller-Hinton | Aerobic, 37°C, 48 h |
|----------------------------------------|------------|-------------------------------------------------------------|---------------|---------------------|
